1 **Can we predict antibody responses in SARS-CoV-2? A cohort**  
2 **analysis.**

3 Running title: Predict SARS-Cov-2 antibody response

4 **Authors:**

5 Mary Gaeddert (1), Philip Kitchen (1), Tobias Broger (1), Stefan Weber (1), Ralf  
6 Bartenschlager (2), Anna Plaszczyca (2), Hans-Georg Kräusslich (3), Barbara Müller  
7 (3), Margarida Souto-Carneiro (4), Maike Janssen (4), Carsten Müller-Tidow (4), Uta  
8 Merle (5), Yannis Herrmann (1), Lukas Raedeker (1), Jakob Sebastian (1), Niall  
9 Brindl (1), Tim Starck (6), Claudia M. Denking (1)

10

11 **Author affiliations:**

- 12 1. Division of Tropical Medicine, Center of Infectious Diseases, Heidelberg  
13 University Hospital, Germany
- 14 2. Department of Infectious Diseases, Molecular Virology, Heidelberg University  
15 Hospital, Heidelberg, Germany
- 16 3. Virology, Center of Infectious Diseases, Heidelberg University Hospital,  
17 Heidelberg, Germany
- 18 4. Department of Internal Medicine V, Heidelberg University Hospital, Heidelberg,  
19 Germany.
- 20 5. Department of Gastroenterology, Heidelberg University Hospital, Germany
- 21 6. Heidelberg Institute of Global Health, Heidelberg University Hospital, Heidelberg,  
22 Germany

23 **Corresponding author:**

24 Claudia M. Denkinger, [Claudia.Denkinger@uni-heidelberg.de](mailto:Claudia.Denkinger@uni-heidelberg.de), Phone: 0049 6221 56-  
25 22999, Fax: 0049 6221 56-5204

26 **Abstract word count:** 200/200

27 **Text word count:** 2,799/3,500

28

29 **Abstract**

30 *Background:* After infection with severe acute respiratory syndrome coronavirus  
31 (SARS-CoV-2), Immunoglobulin G (IgG) antibodies and virus-specific neutralizing  
32 antibodies (nAbs) develop. This study describes antibody responses in a cohort of  
33 recovered COVID-19 patients to identify predictors.

34

35 *Methods:* We recruited patients with confirmed SARS-CoV-2 infection from  
36 Heidelberg, Germany. Blood samples were collected three weeks after COVID-19  
37 symptoms ended. Participants with high antibody titers were invited for follow-up  
38 visits. IgG titers were measured by the Euroimmun Assay, and nAbs titers in a  
39 SARS-CoV-2 infection-based assay.

40

41 *Results:* 281 participants were enrolled between April and August 2020 with IgG  
42 testing, 145 (51.6%) had nAbs, and 35 (12.5%) had follow-up. The median IgG  
43 optical density (OD) ratio was 3.1 (Interquartile range (IQR) 1.6-5.1), and 24.1%  
44 (35/145) had a nAb titer >1:80. Higher IgG titers were associated with increased age  
45 and more severe disease, and higher nAbs were associated with male gender and

46 CT-value of 25-30 on RT-PCR at diagnosis. The median IgG OD ratio on follow-up  
47 was 3.7 (IQR 2.9-5.9), a median increase of 0.5 (IQR -0.3-1.7). Six participants with  
48 follow-up nAbs all had titers  $\leq$  1:80.

49

50 *Conclusions:* While age and disease severity were correlated with IgG responses,  
51 predictive factors for nAbs in convalescent patients remain unclear.

52

53 **Keywords:** antibody, IgG, neutralizing antibodies, seroconversion, SARS-CoV-2,  
54 COVID-19

55

56

57 **Introduction**

58 An understanding of the robustness of the antibody response against severe acute  
59 respiratory syndrome coronavirus 2 (SARS-CoV-2) and its longevity is critical to  
60 determine the necessary levels and duration of antibody titers that confer protection  
61 against re-infection.

62

63 After infection with the severe acute respiratory syndrome coronavirus 2 (SARS-CoV-  
64 2), about two thirds of hospitalized patients show IgG seroconversion within the first  
65 two weeks of infection [1] while later it will be up to 90% [2]. In contrast for mild  
66 cases, seroconversion might only be observed in 48% [2]. Previous studies in  
67 hospitalized patients with Coronavirus disease 2019 (COVID-19) indicate some  
68 correlation between disease severity and strength of the antibody response [3-6].  
69 Also, studies have reported varying results regarding the change of IgG antibodies  
70 over time, with some evidence that this time course may also be related to disease  
71 severity [6-8].

72

73 Virus-specific neutralizing antibodies (nAbs) have the ability to inhibit virus replication  
74 in an ongoing infection and are likely to play a role in preventing re-infection. It has  
75 been shown that SARS-CoV-2 infection can result in the production of antibodies  
76 with neutralizing properties in vitro and protective effects in animal models [9].  
77 However, the precise correlation between IgG levels and nAb response [10], as well  
78 as the predictors of nAbs in an effective and durable immune response against  
79 SARS-CoV-2 [9, 11] have not been clarified. Similar to IgG levels, nAbs may

80 decrease several months after infection, but tend to remain higher following  
81 symptomatic infection compared with asymptomatic [8].

82

83 Understanding the levels of IgG and nAbs that are relevant for protection is also  
84 important for the use of convalescent plasma in the treatment of SARS-CoV-2.  
85 Convalescent plasma has already been authorized by the FDA under Emergency  
86 Use Authorization [12, 13], however the impact on patient outcomes has been  
87 variable [14, 15]. There is therefore also an urgent need to identify factors that predict  
88 which convalescent patients will have robust immune responses to SARS-CoV-2  
89 infection and be suitable to serve as plasma donors.

90

91 The aim of this study is to describe the antibody response in a cohort of recovered  
92 COVID-19 patients and identify predictors of total IgG and neutralizing antibody  
93 responses. The results will be useful in identifying the most suitable plasma donors  
94 and may further contribute to understanding the risk for future re-infection.

95

## 96 **Methods**

### 97 ***Study design and participants***

98 Convalescent COVID-19 patients from the Rhein-Neckar region surrounding  
99 Heidelberg, Germany, were recruited for this study. Participants were identified by  
100 the local Public Health Authority as meeting the current guidelines for COVID testing  
101 (exposure to a SARS CoV-2 positive case, suggestive symptoms, or travel to a risk

102 area) and were tested in a certified test center in the Heidelberg area. Those who  
103 tested positive for SARS-CoV-2 infection were contacted approximately two to three  
104 weeks after the positive test and asked to participate in the study. A survey  
105 conducted online or by telephone collected retrospective data on demographic and  
106 clinical information, including symptoms, hospitalization, and measures of COVID-19  
107 disease severity. After survey completion, participants were screened for potential  
108 plasma donation. The inclusion criteria for plasma donation were age less than 65  
109 years and no comorbidities. Participants from outside the Rhein Neckar region were  
110 also recruited through a public advertisement of the COVID-19 plasma donor  
111 program. These participants followed the procedures below but did not complete the  
112 survey and are missing the demographic and clinical information.

113

114 The first study visit was conducted at the Heidelberg University Hospital at least three  
115 weeks after symptoms ended. During this visit, a nasopharyngeal swab and blood  
116 samples were collected for testing as described below. Convalescent patients with  
117 high IgG levels (optical density (OD) ratio > 2.5) and a nAbs titer (> 1:80) were invited  
118 to participate as plasma donors. Serologic testing was performed again at the time of  
119 plasma donation.

120

121 All procedures were performed in accordance with the ethical standards of the  
122 institutional research committee of Heidelberg University (study approval number  
123 S686/2018). Written informed consent was obtained from each participant.

124

125 ***Molecular Assays***

126 Nasopharyngeal swabs (eSwabs, Copan) were analyzed with Allplex 2019-nCoV  
127 Assay (Seegene Inc, Seoul, South Korea) and Tib-Molbiol 2019-nCoV LightMix (TIB  
128 Molbiol, Berlin, Germany) for viral RNA using reverse-transcriptase polymerase chain  
129 reaction (RT-PCR) designed to detect RdRP and N genes specific for SARS-CoV-2  
130 and the E gene for all of Sarbecovirus including SARS-CoV-2. Cycle threshold-  
131 values (CT-values) under 38 were considered positive.

132

133 ***Serological Assay***

134 Enzyme linked immunosorbent assay (ELISA) measurements for determination of  
135 IgG reactivity against the S1 domain of the viral spike (S) protein were carried out  
136 using the Euroimmun Anti-SARS-CoV-2-ELISA (IgG) (EI 2606-9601 G;  
137 EUROIMMUN Medizinische Labordiagnostika AG, Lübeck, Germany) test kit  
138 according to the manufacturer's protocol. Samples were processed on an  
139 Euroimmun Analyzer I instrument according to the manufacturer's instructions.  
140 Immunoreactivity was determined by measuring the optical density at 450 nm  
141 (OD450) and divided by the OD450 of a calibrator comprised in the kit to minimize  
142 inter-assay variation. The interpretation of the semi-quantitative ratiometric values  
143 obtained followed the manufacturer's test instructions: ratios <0.8 were classified as  
144 negative, 0.8-1.1 as borderline, and  $\geq 1.1$  or higher as positive. Sera with an OD ratio  
145 >2.5 were tested for the presence of neutralizing antibodies. A subset of samples  
146 was also tested with an ELISA assay targeting viral nucleocapsid antigen using the  
147 EDI<sup>TM</sup> Novel Coronavirus COVID-19 IgG ELISA Kit (Epitope Diagnostics Inc, San

148 Diego CA, USA), according to the manufacturer's instructions. Samples were  
149 analyzed in the SpectraMax M2<sup>e</sup> multi-detection microplate reader (Molecular  
150 Devices, USA) at 450nm. Samples with an O.D. at 450nm  $\geq 0.22$  were considered  
151 positive. To minimize inter-assay variation the O.D. values were divided by the kit's  
152 internal calibration control. The interpretation of the semi-quantitative ratiometric  
153 values was carried out similarly as for the S1 domain of the viral spike protein.

154

### 155 ***Neutralization assay***

156 VeroE6 cells were seeded into 96-well plates one day before the assay. Serial  
157 dilutions of sera starting from a 1:10 dilution were prepared in OptiMEM  
158 (ThermoFisher Scientific, Waltham, MA, USA) in a final volume of 75  $\mu$ l and  
159 incubated with ~24,000 PFU of SARS-CoV-2 (BavPat1/2020 strain, European Virus  
160 Archive) per well for 1 hour at 37 °C in a final volume of 150  $\mu$ l. One third of each  
161 serum-virus mixture (50  $\mu$ l) was then used for infection (final MOI ~0.25). Infections  
162 were performed in duplicates. At 20 hours post-infection, cells were fixed with 5%  
163 formaldehyde and immune-stained using a primary mouse antiserum binding to  
164 double-stranded RNA, a viral replication intermediate (J2 mouse antibody; Scicons,  
165 Szirák, Hungary) and a secondary anti-mouse horseradish peroxidase-coupled  
166 antibody (Merck, Darmstadt, Germany). The signal was developed using the KPL  
167 SureBlue<sup>TM</sup> TMB peroxidase substrate (Seracare, Milford, MA, USA) and measured  
168 in a plate reader at a wavelength of 450 nm. Data were normalized to no-serum  
169 control (100%) and mock-infected control (0%). The neutralization (NT) titer was



170 defined as the highest serum dilution resulting in more than 50% reduction of the  
171 normalized signal.

172

### 173 ***Statistical Analysis***

174 We assessed factors associated with antibody response by analyzing demographic  
175 and clinical characteristics of participants with different levels of IgG and nAbs. Linear  
176 regression was performed to determine the association of demographic and clinical  
177 characteristics with IgG antibody titers as a continuous outcome. Logistic regression  
178 was performed to study the association of the same covariates with nAbs as a  
179 categorical outcome. For both regression analyses, factors with a p-value <0.1 in the  
180 univariate analysis were included in the multivariable model, and retained in the  
181 model if the p-value was <0.05 using manual backward elimination. IgG titers from  
182 convalescent and follow-up samples were compared using the Wilcoxon matched-  
183 pairs signed-ranks test. Analysis was performed using Stata version 15.1 (StataCorp  
184 LLC, College Station, TX).

185

### 186 ***Definitions***

187 The first swab collected by the Public Health Authority for initial diagnosis of SARS-  
188 CoV-2 infection is referred to as the 'diagnostic swab', and the second swab  
189 collected at the screening visit for plasma donation is referred to as the 'convalescent  
190 swab'. An IgG OD ratio <1.1 was defined as negative, 1.1 to 2.5 as weak positive,  
191 and >2.5 as high positive. NAbs were categorized into high and low, with titers  $\leq 1:80$

192 defined as low and >1:80 as high by expert consensus after review of data from an  
193 inpatient cohort.

194

195 An illness severity score was created using a combination of self-reported activity  
196 restriction, the presence of COVID-19 symptoms indicative of severe disease (cough,  
197 fever, or dyspnea), and hospitalization. The categories were defined as mild illness  
198 (normal activity, none of the three symptoms, and not hospitalized), moderate illness  
199 (restricted activity, symptomatic, and not hospitalized), and severe illness (severely  
200 restricted activity, symptomatic, and hospitalized).

201

## 202 **Results**

203 A total of 281 participants were enrolled between April and August 2020. Survey  
204 responses were available for 200 (71.2%) participants. The population was 55%  
205 (107/194) male with a median age of 39 ([Interquartile range] IQR 29-50) (Table 1).  
206 Only 3/171 (1.8%) participants were hospitalized, with one in intensive care. The  
207 median CT-value at the time of diagnosis was available for 165/281 and was 25 (IQR  
208 20 to 28). IgG testing was performed for all 281 participants and of these, ODs were  
209 >2.5 in 145 (51.6%). Thirty-five participants (12.5%) had serology repeated at the  
210 time of plasma donation.

211

212 Convalescent samples were collected from all participants a median of 34 days (IQR  
213 28-43) after the diagnostic swab and 29 days (IQR 22 to 37) after the end of

214 symptoms. The median IgG OD ratio at the convalescent visit was 3.1 (IQR 1.6 to  
215 5.1), with 58.7% (165/281) of participants categorized as having a highly positive  
216 antibody response, 26.0% (73/281) with a positive response, and 15.3% 43/281  
217 (15.3%) with a negative or borderline IgG antibody response. Only 24.1% of the  
218 tested participants (35/145) displayed a nAb titer >1:80. All three hospitalized  
219 participants displayed nAb titers of 1:160. The convalescent swab was positive by  
220 RT-PCR in 9.1% (25/274) of participants and the median CT value was 37 (IQR 35 to  
221 38). Of those who had a positive convalescent swab, 25% (5/20) had nAbs >1:80.

222

223 The IgG convalescent titer was highest in adults 18 to 29 years old, decreasing in 30-  
224 to 44-year-olds, and increasing again in adults 45 to 60 years of age (Table 2 and  
225 Figure 1). The nAbs titers, in contrast, did not show a statistically significant change  
226 by age (Table 3 and Supplemental Figure 1). There was a correlation between  
227 increasing IgG titer and nAbs titer although Kappa was low (OR=1.6 ([95%  
228 Confidence Interval] 95%CI 1.3-1.9),  $p < 0.001$ , Kappa=0.095) (Figure 2). The IgG OD  
229 ratio of convalescent sera was neither correlated with the CT-value of the diagnostic  
230 swab ( $p = 0.666$ ) (Supplemental Figure 2) nor with that of the convalescent swab  
231 ( $p = 0.727$ ).

232

233 The results of the multiple linear regression model on 200 patients with IgG results  
234 and information from the survey showed that higher IgG antibody titers were  
235 associated with age 45 to 60 years (0.8, 95%CI 0.05-1.6,  $p = 0.036$ ), compared to age  
236 30 to 44) and moderate/severe activity restriction (2.1, 95%CI 1.2-3.0,  $p < 0.001$ ),

237 compared to normal activity) (Table 2). A similar analysis carried out on the 120  
238 participants with survey results and nAb titers showed that male gender (2.2, 95% CI  
239 0.9-5.6,  $p=0.097$ , compared to female) and a CT-value of 25-30 (4.9, 95%CI 0.9-  
240 25.8,  $p=0.062$ , compared to CT-value>30) from the diagnostic swab were associated  
241 with high nAb titers in the univariate logistic regression model at the 0.1 level (Table  
242 3 and Supplemental Figure 3).

243

244 For the 63 participants tested with the nucleocapsid protein ELISA, IgG levels were  
245 classified as negative for 24 (38.1%), 11 (17.5%) as weak positive, and 28 (44.4%)  
246 as high positive. The correlation between the spike protein and nucleocapsid protein  
247 assays was 73.0% (Kappa=0.548) and the nucleocapsid assay and nAbs was 16.7%  
248 (Kappa=0.022) (Supplemental Figure 4).

249

250 The illness severity score was analyzed separately as it combined multiple variables  
251 that were already included in the regression models. Based on the categories  
252 outlined above, 32.3% (52/161) were defined as mild, 54.0% (87/161) as moderate,  
253 and 13.7% (22/161) as severe illness. Participants with severe disease had median  
254 IgG titers of 6.0 (IQR 3.8 to 7.6), compared to 2.5 (IQR 1.4 to 4.1) for those with mild  
255 disease and 2.9 (IQR 1.5 to 4.7) for moderate disease ( $p<0.001$ ). For nAbs, we  
256 observed a trend that participants with more severe disease had high titers, but the  
257 difference was not statistically significant (OR 1.9, 95%CI 0.9-3.8,  $p=0.084$ ).

258

259 The 35 participants eligible for the follow-up testing had the second blood collection a  
260 median of 46 days (IQR 23 to 57) after the convalescent testing. The median IgG OD  
261 ratio was 3.7 (IQR 2.9 to 5.9), and 74.3% (26/35) were categorized as having a high  
262 positive IgG response. The IgG titers showed a median increase of 0.5 (IQR -0.3 to  
263 1.7) from convalescent to follow-up testing ( $p < 0.001$ ) (Table 1 and Figure 3). The  
264 nAbs titers from the six follow-up participants were all  $\leq 1:80$  (Figure 4).

265

## 266 **Discussion**

267 This study describes the antibody response in a cohort of 281 recovered COVID-19  
268 patients. Our results show that older age (45-65 years) and more severe disease  
269 were associated with a stronger IgG response. This response was sustained up to 47  
270 days after the convalescent sample in those who had a follow-up visit. However,  
271 there was poor correlation between clinical characteristics and the strength of a  
272 neutralizing antibody response. Furthermore, in the few participants that had nAbs  
273 follow-up testing, a reduction in the neutralization capacity of the circulating IgG  
274 antibodies was observed. The persistence of nAbs over time must be confirmed in  
275 future studies with larger cohorts.

276

277 We found 15.3% of patients not to have an antibody response at initial testing. This  
278 finding is similar to a finding in a study of over 1,300 SARS-CoV-2 patients in New  
279 York City that reported IgG seroconversion to the S protein in 89% PCR-positive  
280 patients at the time of initial testing from Wajnberg et al. Our observation of the IgG  
281 response being correlated with age and disease severity confirms the findings of a

282 prior study by Klein et al, where older age and hospitalization was associated with  
283 stronger anti-SARS-CoV-2 antibody response quantified by both IgG levels against  
284 the S protein and nAb titers [10]. In this study of 126 plasma donors, male sex and  
285 older age were also observed to be associated, however we were only able to  
286 deduce an association of nAbs but not IgG levels with male sex.

287

288 While our study showed persistence of an IgG response after a month and a half in  
289 those with high initial IgG titers, a study of 365,000 adults in England by Ward et al.  
290 showed a decline in the prevalence of SARS-CoV-2 antibodies over the course of  
291 three months. The decline in IgG positivity was greatest among those who reported  
292 no symptoms, a population that was underrepresented in our study [16].

293

294 These findings have implications for the selection of convalescent donors of plasma  
295 for plasma therapy [13]. Thus, in order to improve the anti-SARS-CoV-2 IgG titers  
296 present in the donated plasma, donors should be selected from those with a more  
297 severe course of COVID-19 disease and asked to donate plasma as soon as  
298 possible after convalescence [10, 17]. Furthermore, these findings might have  
299 implications for immunity against repeat infections. However, further data is needed  
300 to understand whether antibodies or T cells confer protective immunity to SARS-  
301 CoV-2.

302

303 At the convalescent study visit, 9% of participants remained positive for SARS-CoV-2  
304 on PCR. However, all CT-values were >30, indicating a low viral load and likely non-  
305 viable virus particles. These data are in line with other studies reporting positive PCR  
306 results up to 28 days and longer after symptom resolution [3, 18-20]. Surprisingly,  
307 persistent viral shedding was not associated with IgG or nAbs response in our  
308 analysis, supporting the idea that shed RNA is not an indicator of ongoing infection  
309 [3, 8].

310

311 This study has several limitations. The criteria for plasma donation restricted  
312 participation to healthy people under 60 years of age. Further, the survey responses  
313 showed that most participants had relatively mild COVID-19 disease, although  
314 asymptomatic participants were underrepresented and very few were hospitalized.  
315 These factors indicate that the results may not be generalizable to populations who  
316 are older than 60, have severe disease, have comorbidities, or to asymptomatic  
317 patients. Most participants only had one serum sample collected, so there is limited  
318 data on the change in antibody titers over time. The variability in the nAb response  
319 would require evaluation of larger numbers of convalescent patients in order to yield  
320 a better understanding of predictive factors.

321

322 This study also has several strengths. We present the IgG response in over 200  
323 participants and nAbs in 145 participants. We also collected follow-up data for those  
324 participants who had a strong IgG and nAbs response at baseline. The information

325 on illness severity and PCR results from both diagnosis and convalescent time-points  
326 provided a fuller clinical picture.

327

### 328 **Conclusion**

329 While older age and disease severity were correlated with stronger IgG responses,  
330 the predictive factors for strong neutralizing antibody response in convalescent  
331 patients remain unclear.



332 **Footnote page:**

333 **Conflict of interest:** The authors declare that they have no competing interests.

334 **Funding:** This work was supported by the German Federal Ministry of Education and  
335 Research (BMBF) program on emergency research funding for COVID-19 (funding  
336 number 01KG20152) and internal funds of Heidelberg University Hospital.

337 **Corresponding author:**

338 Claudia M. Denking

339 Address: Section of Clinical Tropical Medicine, Center for Infectious Disease,  
340 Heidelberg University Hospital, Im Neuenheimer Feld 324, Heidelberg 69120,  
341 Germany

342 Telephone: 0049 6221 56-22999; Fax: 0049 6221 56-5204

343 [Claudia.Denking@uni-heidelberg.de](mailto:Claudia.Denking@uni-heidelberg.de)

344 **Author contributions:** CMD was responsible for the conceptualization and design of  
345 the study and supervised the analysis and writing. MG was responsible for the  
346 statistical analysis and writing. CMT, PK and TB were responsible for the literature  
347 review and supported the conceptualization and design of the study. PK, YH, LR, JS,  
348 MJ, NB, and TS were responsible for the survey and patient recruitment. SW and MJ  
349 were responsible for the study visits and blood collection. HGK, RB, MSC, BM and  
350 AP were responsible for the antibody testing. All authors contributed to data  
351 interpretation, critically reviewed the first draft, and approved the final version and  
352 agreed to be accountable for the work.

353 **Ethical Approval:** All procedures performed in studies involving human participants  
354 were in accordance with the ethical standards of the institutional research committee

355 of Heidelberg University (S686/2018) and with the 1964 Helsinki declaration and its  
356 later amendments or comparable ethical standards.

357 **Acknowledgements:** We would like to thank all the participants who contributed to  
358 the survey and plasma donation study. We are grateful to Maria Anders-Össwein,  
359 Stefanie Wolf, and Ira Pistorius for their dedicated expert technical assistance.

## 360 **References**

- 361 1. Xiang F, Wang X, He X, et al. Antibody Detection and Dynamic Characteristics in  
362 Patients With Coronavirus Disease 2019. *Clinical infectious diseases : an official*  
363 *publication of the Infectious Diseases Society of America* **2020**; 71:1930-4.
- 364 2. Imai K, Kitagawa Y, Tabata S, et al. Antibody response patterns in COVID-19  
365 patients with different levels of disease severity—Japan. *medRxiv*  
366 **2020**:2020.11.20.20231696.
- 367 3. Tan W, Lu Y, Zhang J, et al. Viral Kinetics and Antibody Responses in Patients  
368 with COVID-19. *medRxiv* **2020**:2020.03.24.20042382.
- 369 4. To KK-W, Tsang OT-Y, Leung W-S, et al. Temporal profiles of viral load in  
370 posterior oropharyngeal saliva samples and serum antibody responses during  
371 infection by SARS-CoV-2: an observational cohort study. *The Lancet Infectious*  
372 *Diseases* **2020**; 20:565-74.
- 373 5. Zhao J, Yuan Q, Wang H, et al. Antibody responses to SARS-CoV-2 in patients of  
374 novel coronavirus disease 2019. *Clinical Infectious Diseases* **2020**.
- 375 6. Chen Y, Zuiani A, Fischinger S, et al. Quick COVID-19 Healers Sustain Anti-  
376 SARS-CoV-2 Antibody Production. *Cell* **2020**; 183:1496-507.e16.
- 377 7. Iyer AS, Jones FK, Nodoushani A, et al. Dynamics and significance of the antibody  
378 response to SARS-CoV-2 infection. *medRxiv* **2020**:2020.07.18.20155374.
- 379 8. Long Q-X, Tang X-J, Shi Q-L, et al. Clinical and immunological assessment of  
380 asymptomatic SARS-CoV-2 infections. *Nature Medicine* **2020**; 26:1200-4.
- 381 9. Bao L, Deng W, Gao H, et al. Reinfection could not occur in SARS-CoV-2 infected  
382 rhesus macaques. *bioRxiv* **2020**:2020.03.13.990226.

- 383 10. Klein SL, Pekosz A, Park H-S, et al. Sex, age, and hospitalization drive antibody  
384 responses in a COVID-19 convalescent plasma donor population. medRxiv  
385 **2020**:2020.06.26.20139063.
- 386 11. Ju B, Zhang Q, Ge X, et al. Potent human neutralizing antibodies elicited by  
387 SARS-CoV-2 infection. bioRxiv **2020**:2020.03.21.990770.
- 388 12. Valk SJ, Piechotta V, Chai KL, et al. Convalescent plasma or hyperimmune  
389 immunoglobulin for people with COVID-19: a rapid review. The Cochrane database  
390 of systematic reviews **2020**; 5:Cd013600.
- 391 13. Administration UFaD. Recommendations for Investigational COVID-19  
392 Convalescent Plasma. Available at: [https://www.fda.gov/vaccines-blood-](https://www.fda.gov/vaccines-blood-biologics/investigational-new-drug-ind-or-device-exemption-ide-process-cber/recommendations-investigational-covid-19-convalescent-plasma)  
393 [biologics/investigational-new-drug-ind-or-device-exemption-ide-process-](https://www.fda.gov/vaccines-blood-biologics/investigational-new-drug-ind-or-device-exemption-ide-process-cber/recommendations-investigational-covid-19-convalescent-plasma)  
394 [cber/recommendations-investigational-covid-19-convalescent-plasma](https://www.fda.gov/vaccines-blood-biologics/investigational-new-drug-ind-or-device-exemption-ide-process-cber/recommendations-investigational-covid-19-convalescent-plasma). 2021.
- 395 14. Simonovich VA, Burgos Pratz LD, Scibona P, et al. A Randomized Trial of  
396 Convalescent Plasma in Covid-19 Severe Pneumonia. New England Journal of  
397 Medicine **2020**; 384:619-29.
- 398 15. Libster R, Pérez Marc G, Wappner D, et al. Early High-Titer Plasma Therapy to  
399 Prevent Severe Covid-19 in Older Adults. New England Journal of Medicine **2021**;  
400 384:610-8.
- 401 16. Ward H, Cooke G, Atchison C, et al. Declining prevalence of antibody positivity to  
402 SARS-CoV-2: a community study of 365,000 adults. medRxiv  
403 **2020**:2020.10.26.20219725.
- 404 17. Wu F, Wang A, Liu M, et al. Neutralizing antibody responses to SARS-CoV-2 in a  
405 COVID-19 recovered patient cohort and their implications. medRxiv  
406 **2020**:2020.03.30.20047365.

407 18. Wajnberg A, Mansour M, Leven E, et al. Humoral immune response and  
408 prolonged PCR positivity in a cohort of 1343 SARS-CoV 2 patients in the New York  
409 City region. medRxiv **2020**:2020.04.30.20085613.

410 19. Wang B, Wang L, Kong X, et al. Long-term coexistence of SARS-CoV-2 with  
411 antibody response in COVID-19 patients. Journal of Medical Virology **2020**; 92:1684-  
412 9.

413 20. Zhang G, Nie S, Zhang Z, Zhang Z. Longitudinal Change of Severe Acute  
414 Respiratory Syndrome Coronavirus 2 Antibodies in Patients with Coronavirus  
415 Disease 2019. The Journal of infectious diseases **2020**; 222:183-8.

416

417 **Table 1. Demographic and clinical characteristic of participants with**  
 418 **convalescent testing (n=281)**

|                                                           | n/N                 | %    |
|-----------------------------------------------------------|---------------------|------|
| <b>Demographics</b>                                       |                     |      |
| Age, median [IQR]                                         | 39 [29-50]          |      |
| Gender                                                    |                     |      |
| Male                                                      | 107/194             | 55.2 |
| Female                                                    | 86/194              | 44.3 |
| Diverse                                                   | 1/194               | 0.5  |
| <b>Diagnosis</b>                                          |                     |      |
| CT value of diagnostic swab, median [IQR]                 | 25 [20-28]          |      |
| CT value of diagnostic swab                               |                     |      |
| <25                                                       | 87/165 <sup>a</sup> | 52.7 |
| 25-30                                                     | 54/165              | 32.7 |
| >30                                                       | 24/165              | 14.6 |
| <b>Convalescent testing</b>                               |                     |      |
| Days from diagnosis to convalescent testing, median [IQR] | 34 [28-43]          |      |
| Days from end of symptoms to                              |                     |      |

|                                                         |               |      |
|---------------------------------------------------------|---------------|------|
| convalescent testing, median [IQR]                      | 29 [22-37]    |      |
| Result of convalescent swab                             |               |      |
| Negative                                                | 249/274       | 90.9 |
| Positive                                                | 25/274        | 9.1  |
| CT value of convalescent swab if positive, median [IQR] | 37 [35-38]    |      |
| IgG OD ratio, median [IQR]                              | 3.1 [1.6-5.1] |      |
| IgG result                                              |               |      |
| Negative/Borderline (<1.1)                              | 43/281        | 15.3 |
| Weak positive (1.1-2.5)                                 | 73/281        | 26.0 |
| High positive (>2.5)                                    | 165/281       | 58.7 |
| Neutralizing Antibodies                                 |               |      |
| Low ( $\leq 1:80$ )                                     | 110/145       | 75.9 |
| High ( $> 1:80$ )                                       | 35/145        | 24.1 |
| Neutralizing Antibodies if convalescent swab positive   |               |      |
| Low ( $\leq 1:80$ )                                     | 15/20         | 75.0 |
| High ( $> 1:80$ )                                       | 5/20          | 25.0 |
| <b>Follow-up testing (N=35)</b>                         |               |      |

|                                                              |                |       |
|--------------------------------------------------------------|----------------|-------|
| Days from convalescent to follow-up blood draw, median [IQR] | 46 [23-57]     |       |
| Follow-up IgG result, median [IQR]                           | 3.7 [2.9-5.9]  |       |
| Follow-up IgG result                                         |                |       |
| Negative/Borderline (<1.1)                                   | 2/35           | 5.7   |
| Weak positive (1.1-2.5)                                      | 5/35           | 14.3  |
| High positive (>2.5)                                         | 28/35          | 80.0  |
| Change in IgG from convalescent to follow-up, median [IQR]   | 0.5 [-0.3-1.7] |       |
| Follow-up Neutralizing Antibodies                            |                |       |
| Low ( $\leq 1:80$ )                                          | 6/6            | 100.0 |

419 <sup>a</sup>Missing data: gender=87, CT value of diagnostic swab=116, result of convalescent swab=7, results of  
 420 nAbs for convalescent swab-positive=5

421 \*participants missing results of the first swab were diagnosed outside of the University Hospital  
 422 Heidelberg network)

423

424

425 **Table 2. Description of factors associated with Convalescent SARS CoV-2 IgG**  
 426 **titers (n=200)**

| Characteristic<br>n/N (%) | Total<br>population | OD Ratio,<br>Median<br>[IQR] | Simple Linear<br>Regression<br>Coef (95%CI), p- | Multiple Linear<br>Regression<br>Coef (95%CI), p- |
|---------------------------|---------------------|------------------------------|-------------------------------------------------|---------------------------------------------------|
|---------------------------|---------------------|------------------------------|-------------------------------------------------|---------------------------------------------------|



|                      |                |               | value                           | value                           |
|----------------------|----------------|---------------|---------------------------------|---------------------------------|
| <b>Demographic</b>   |                |               |                                 |                                 |
| Age                  |                |               |                                 |                                 |
| 18-29                | 50/200 (25.0)  | 3.7 [1.9-4.4] | 0.1 (-0.8;1.0), 0.829           | 0.2 (-0.7;1.0), 0.666           |
| 30-44                | 75/200 (37.5)  | 2.6 [1.2-4.5] | Reference                       | Reference                       |
| 45-60                | 75/200 (37.5)  | 3.6 [1.8-6.3] | 0.9 (0.2;1.7), <b>0.017</b>     | 0.8 (0.05-1.6), <b>0.036</b>    |
| Gender <sup>a</sup>  |                |               |                                 |                                 |
| Male                 | 107/194 (55.2) | 3.1 [1.5-5.1] | 0.4 (-0.4;1.0), 0.405           |                                 |
| Female               | 86/194 (44.3)  | 3.3 [1.8-4.9] | Reference                       |                                 |
| Diverse <sup>b</sup> | 1/194 (0.5)    | 8.4 [8.4-8.4] |                                 |                                 |
| <b>Clinical</b>      |                |               |                                 |                                 |
| Activity Restriction |                |               |                                 |                                 |
| Normal activity      | 51/188 (27.1)  | 2.2 [1.2-3.9] | Reference                       | Reference                       |
| Minimal restriction  | 81/188 (43.1)  | 3.0 [1.8-4.3] | 0.5 (-0.3;1.4), 0.187           | 0.6 (-0.2;1.4), 0.163           |
| Moderate/Severe      | 56/188 (29.8)  | 5.0 [2.6-7.2] | 2.2 (1.3;3.1), <b>&lt;0.001</b> | 2.1 (1.2;3.0), <b>&lt;0.001</b> |
| Symptomatic          |                |               |                                 |                                 |
| No                   | 4/188 (2.1)    | 2.5 [0.9-4.0] | Reference                       |                                 |
| Yes                  | 184/188 (97.9) | 3.2 [1.8-5.1] | 1.2 (-1.2;3.7), 0.325           |                                 |
| Fever only           |                |               |                                 |                                 |

|                                                       |                |               |                              |  |
|-------------------------------------------------------|----------------|---------------|------------------------------|--|
| No                                                    | 118/192 (61.5) | 2.9 [1.5-4.5] | Reference                    |  |
| Yes                                                   | 74/192 (38.5)  | 3.5 [2.1-5.9] | 0.9 (0.2;1.6), <b>0.010</b>  |  |
| Fever, Dyspnea, or<br>Cough                           |                |               |                              |  |
| No                                                    | 76/192 (39.6)  | 2.8 [1.6-4.4] | Reference                    |  |
| Yes                                                   | 116/192 (60.4) | 3.4 [1.9-5.6] | 0.7 (0.03;1.4), <b>0.040</b> |  |
| Symptom duration                                      |                |               |                              |  |
| 0-10 days                                             | 60/200 (30.0)  | 2.9 [1.6-4.5] | Reference                    |  |
| 11-20 days                                            | 87/200 (43.5)  | 3.5 [2.1-5.7] | 0.9 (0.1;1.7), <b>0.034</b>  |  |
| >20 days                                              | 53/200 (26.5)  | 2.9 [1.4-5.0] | 0.2 (-0.7;1.1), 0.731        |  |
| <b>Convalescent testing</b>                           |                |               |                              |  |
| Days from Symptom<br>onset to convalescent<br>testing |                |               |                              |  |
| 0-35                                                  | 63/180 (35.0)  | 2.6 [1.5-4.9] | Reference                    |  |
| 35-50                                                 | 89/180 (49.4)  | 3.4 [2.0-5.5] | 0.6 (-0.2;1.4), 0.145        |  |
| >50                                                   | 28/180 (15.6)  | 3.5 [1.6-6.4] | 0.7 (-0.4;1.8), 0.182        |  |
| CT value of diagnostic<br>swab                        |                |               |                              |  |
| <25                                                   | 79/151 (52.3)  | 3.3 [2.1-4.9] | -0.1 (-1.2;1.0), 0.880       |  |

|                             |                |               |                       |  |
|-----------------------------|----------------|---------------|-----------------------|--|
| 25-30                       | 48/151 (31.8)  | 3.6 [1.6-5.8] | 0.3 (-0.9;1.6), 0.569 |  |
| >30                         | 24/151 (15.9)  | 3.5 [1.9-4.8] | Reference             |  |
| Result of convalescent swab |                |               |                       |  |
| Negative                    | 177/199 (88.5) | 3.0 [1.6-5.1] | Reference             |  |
| Positive                    | 22/199 (11.1)  | 3.8 [2.2-4.7] | 0.2 (-0.9;1.2), 0.780 |  |

427 <sup>a</sup>Missing data: gender=6, Activity Restriction n=12; Symptomatic n=12; specific symptoms n=8; start of

428 symptoms n=20; diagnostic swab n=49; convalescent swab n=1

429 <sup>b</sup>Diverse gender (n=1) excluded from regression model

430

431

432 **Table 3. Description of factors associated with Convalescent SARS CoV-2**

433 **Neutralizing antibody titers (n=120)**

| Characteristic<br>n/N (%) | Total<br>population | Low ( $\leq 1:80$ ) | High ( $> 1:80$ ) | Logistic Regression,<br>Univariate<br>OR (95% CI), p-<br>value |
|---------------------------|---------------------|---------------------|-------------------|----------------------------------------------------------------|
| <b>Demographic</b>        |                     |                     |                   |                                                                |
| Age                       |                     |                     |                   |                                                                |
| 18-29                     | 31/120 (25.8)       | 25/90 (27.8)        | 6/30 (20.0)       | Reference                                                      |
| 30-44                     | 40/120 (33.3)       | 31/90 (34.4)        | 9/30 (30.0)       | 1.2 (0.4-3.9), 0.748                                           |

|                          |               |              |              |                             |
|--------------------------|---------------|--------------|--------------|-----------------------------|
| 45-60                    | 49/120 (40.8) | 34/90 (37.8) | 15/30 (50.0) | 1.8 (0.6-5.4), 0.269        |
| Gender <sup>a</sup>      |               |              |              |                             |
| Male                     | 63/116 (54.3) | 45/89 (50.6) | 18/27 (66.7) | 2.2 (0.9-5.6), <b>0.097</b> |
| Female                   | 52/116 (44.8) | 44/89 (49.4) | 8/27 (29.6)  | Reference                   |
| Diverse <sup>b</sup>     | 1/116 (0.9)   | 0            | 1/27 (3.7)   |                             |
| <b>Clinical</b>          |               |              |              |                             |
| Activity Restriction     |               |              |              |                             |
| Normal activity          | 27/114 (23.7) | 23/87 (26.4) | 4/27 (14.8)  | Reference                   |
| Minimal restriction      | 43/114 (37.7) | 33/87 (37.9) | 10/27 (37.0) | 1.7 (0.5-6.2), 0.394        |
| Moderate/Severe          | 44/114 (38.6) | 31/87 (35.6) | 13/27 (48.2) | 2.4 (0.7-8.4), 0.165        |
| Fever only               |               |              |              |                             |
| No                       | 66/116 (56.9) | 53/89 (59.6) | 13/27 (48.2) | Reference                   |
| Yes                      | 50/116 (43.1) | 36/89 (40.5) | 14/27 (51.9) | 1.6 (0.7-3.8), 0.297        |
| Fever, Dyspnea, or Cough |               |              |              |                             |
| No                       | 41/116 (35.3) | 35/89 (39.3) | 6/27 (22.2)  | Reference                   |
| Yes                      | 75/116 (64.7) | 54/89 (60.7) | 21/27 (77.8) | 2.3 (0.8-6.2), 0.109        |
| Symptom duration         |               |              |              |                             |
| 0-10 days                | 37/120 (30.8) | 30/30 (33.3) | 7/30 (23.3)  | Reference                   |
| 11-20 days               | 59/120 (49.2) | 43/90 (47.8) | 16/30 (53.3) | 1.6 (0.6-4.3), 0.362        |

|                                                    |                |              |              |                              |
|----------------------------------------------------|----------------|--------------|--------------|------------------------------|
| >20 days                                           | 24/120 (20.0)  | 17/90 (18.9) | 7/30 (23.3)  | 1.8 (0.5-5.9), 0.355         |
| <b>Convalescent testing</b>                        |                |              |              |                              |
| CT value – diagnostic swab                         |                |              |              |                              |
| <25                                                | 53/96 (55.2)   | 42/71 (59.2) | 11/25 (44.0) | 1.7 (0.3-8.7), 0.522         |
| 25-30                                              | 28/96 (29.2)   | 16/71 (22.5) | 12/25 (48.0) | 4.9 (0.9-25.8), <b>0.062</b> |
| >30                                                | 15/96 (15.6)   | 13/71 (18.3) | 2/25 (8.0)   | Reference                    |
| Result of convalescent swab                        |                |              |              |                              |
| Negative                                           | 101/119 (84.9) | 75/89 (84.3) | 26/30 (86.7) | Reference                    |
| Positive                                           | 18/119 (15.1)  | 14/89 (15.7) | 4/30 (13.3)  | 0.8 (0.2-2.7), 0.752         |
| Days Symptom onset to Antibody test                |                |              |              |                              |
| 0-35                                               | 40/112 (35.7)  | 31/86 (36.1) | 9/26 (34.6)  | Reference                    |
| 35-50                                              | 58/112 (51.8)  | 45/86 (52.3) | 13/26 (50.0) | 1.1 (0.4-2.8), 0.907         |
| >50                                                | 14/112 (12.5)  | 10/86 (11.6) | 4/26 (15.4)  | 1.5 (0.4-5.8), 0.585         |
| Days from diagnosis to Antibody test, median [IQR] |                | 35 [30-43]   | 32 [25-40]   | 1.0 (1.0-1.0), 0.806         |

434 <sup>a</sup>Missing data: gender=4, Activity Restriction n=6; Symptomatic n=4; specific symptoms n=8;

435 diagnostic swab n=24; convalescent swab n=1; start of symptoms n=8

436 <sup>b</sup>Diverse gender (n=1) excluded from regression model

437

## 438 **Figure titles and legends**

439

### 440 **Figure 1. Convalescent SARS CoV-2 IgG by age category**

441 *The IgG OD ratio at the convalescent visit by age of the participant.*

442

### 443 **Figure 2. Convalescent SARS CoV-2 Neutralizing antibody and IgG titers**

444 *The IgG OD ratio compared to the Neutralizing antibody titer at the convalescent visit.*

445

### 446 **Figure 3. Change in SARS CoV-2 IgG levels from Convalescent to Follow-up testing**

447 *The change in IgG OD ratio from the convalescent to the follow-up time points for 35*

448 *participants with available data. Dark blue lines indicate increasing OD ratio, and light blue*

449 *lines indicate the same or decreasing OD ratio.*

450

### 451 **Figure 4. Change in SARS CoV-2 Neutralizing antibody from Convalescent to Follow-** 452 **up testing**

453 *The change in neutralizing antibody titers from the convalescent to the follow-up time points*

454 *for 5 participants with both timepoints available. There are two participants with 1:40 titers at*

455 *both Convalescent and Follow-up timepoints.*

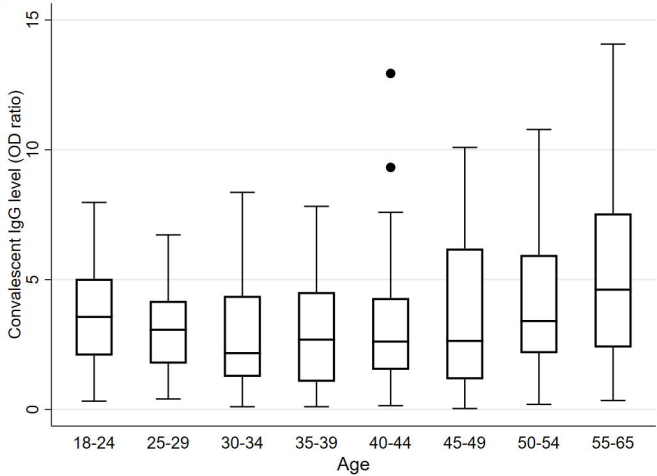

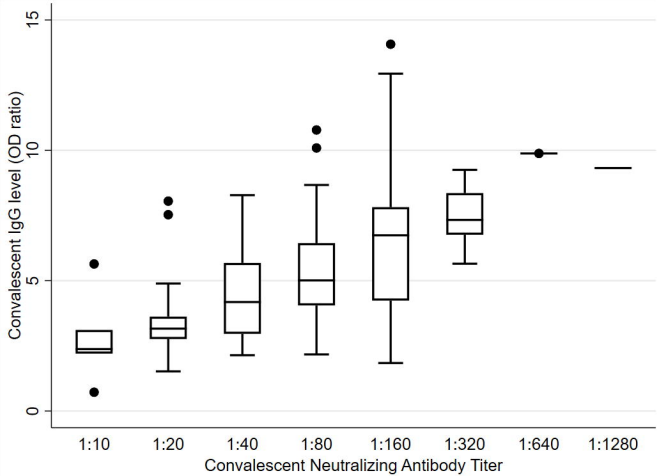



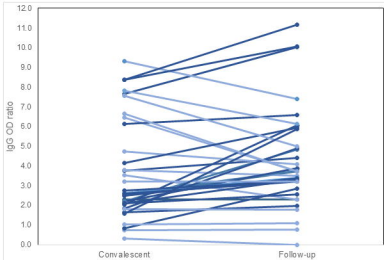

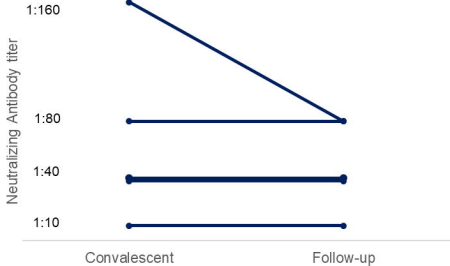

Source: https://medrxiv.org/content/medrxiv/early/2021/03/17/2021.03.15.21253267.full.pdf
